# Supplementary material
Source: Royal Society of Chemistry journal article supplement (doi:10.1039/d6cp00648e)
Supplement: d6cp00648e1.pdf [file d6cp00648e1.pdf]

## Supporting Information

### Strain Modulated Hydrogen Storage Aspects, Optoelectronic, and Thermoelectric Energy Harvesting in a Newly Synthesized BaSiH<sub>6</sub>

Usman Saeed<sup>1</sup>, Samia Shahzadi<sup>1</sup>, A. Ibrahim<sup>2</sup>, and S. Nazir<sup>1\*</sup>

<sup>1</sup>*Department of Physics, University of Sargodha, 40100 Sargodha, Pakistan and*

<sup>2</sup>*Department of Physics, College of Science, King Khalid University - P. O. Box: 9004 - Postal Code: 61413, Abha, Asir, Kingdom of Saudi Arabia*

---

\* Electronic address: [safdar.nazir@uos.edu.pk](mailto:safdar.nazir@uos.edu.pk), Tel: +92-334-971-9060

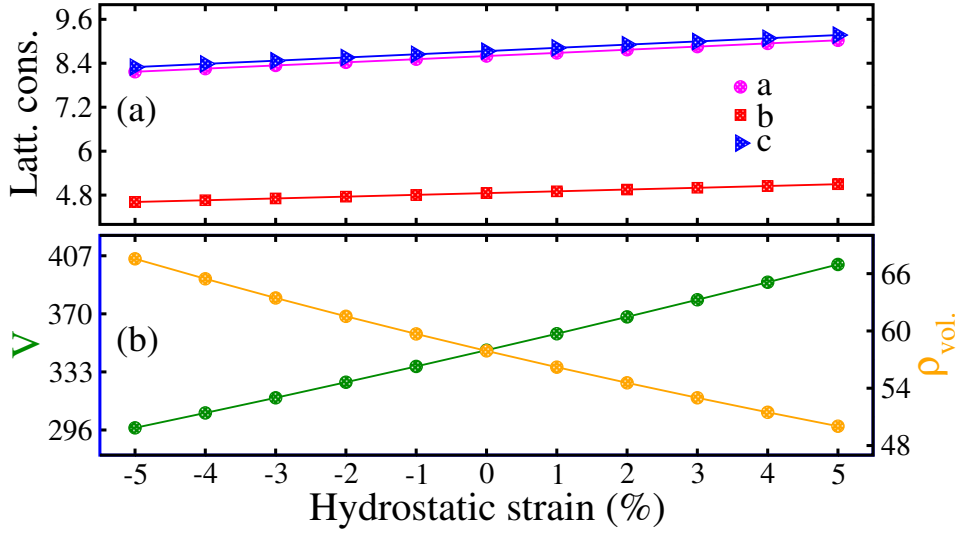

FIG. 1S: Calculated (a) optimized lattice constants (Latt. cons.) in Å, (b-left) unit cell volume ( $V$ ) in Å<sup>3</sup>, and (b-right) volumetric capacity ( $\rho_{vol.}$ ) in g.H<sub>2</sub>/L as a function of  $\pm 5\%$  hydrostatic strain for the BaSiH<sub>6</sub> structure.

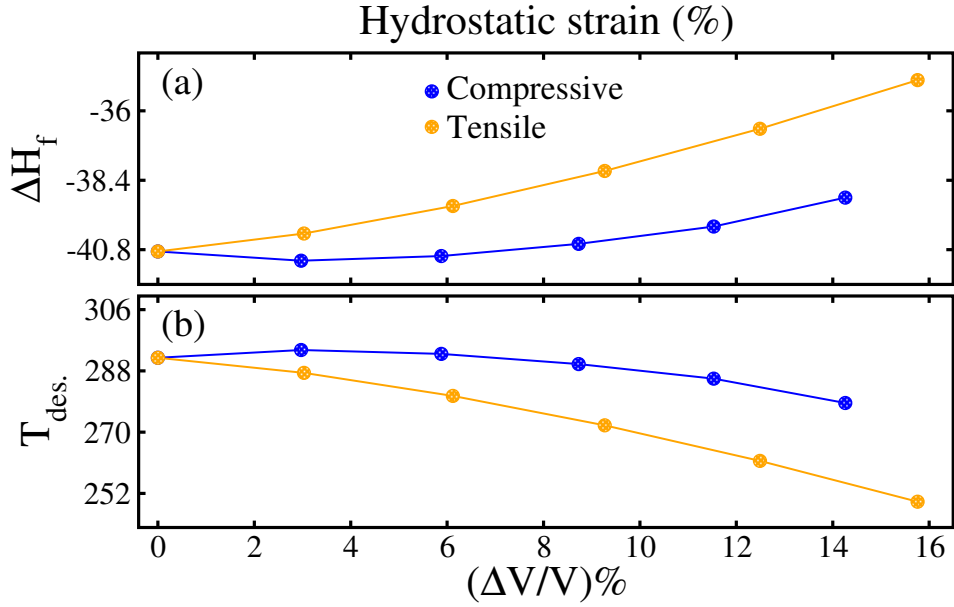

FIG. 2S: Computed (a) formation enthalpy ( $\Delta H$ ) in kJ/mol.H<sub>2</sub> and (b) hydrogen desorption temperature ( $T_{des.}$ ) in K as a function of  $\frac{\Delta V}{V}\%$  of the BaSiH<sub>6</sub> structure.

TABLE 1S: Computed numerous elastic properties under hydrostatic-([111]) strain of the BaSiH<sub>6</sub> system.

| Strain | Young's modulus |           |       | Linear compressibility |               |      | Shear modulus |           |       | Poisson's ratio |             |
|--------|-----------------|-----------|-------|------------------------|---------------|------|---------------|-----------|-------|-----------------|-------------|
|        | $Y_{min}$       | $Y_{max}$ | $A$   | $\beta_{min}$          | $\beta_{max}$ | $A$  | $G_{min}$     | $G_{max}$ | $A$   | $\nu_{min}$     | $\nu_{max}$ |
| -5%    | 25.686          | 101.04    | 3.93  | 4.4662                 | 7.2305        | 1.62 | 7.32          | 32.68     | 4.464 | -0.1803         | 0.86444     |
| 0%     | 18.836          | 83.86     | 4.45  | 5.062                  | 19.698        | 3.89 | 8.7775        | 32.041    | 3.65  | -0.1059         | 0.83969     |
| +5%    | 12.883          | 54.34     | 4.218 | 9.348                  | 13.56         | 1.45 | 3.63          | 22.292    | 6.14  | 0.05019         | 0.77489     |

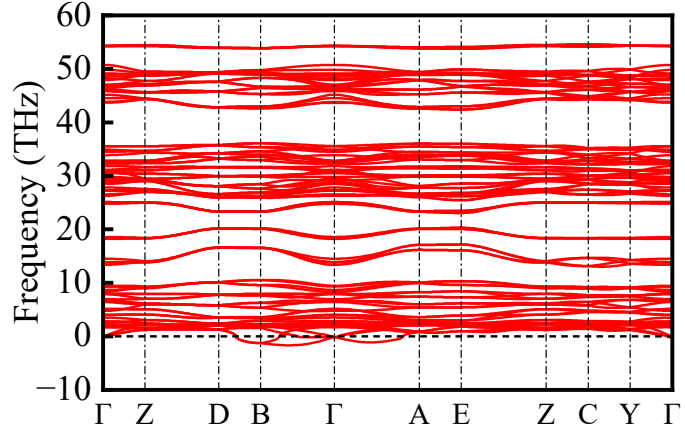

FIG. 3S: Computed phonon dispersion curves of the BaSiH<sub>6</sub> structure.

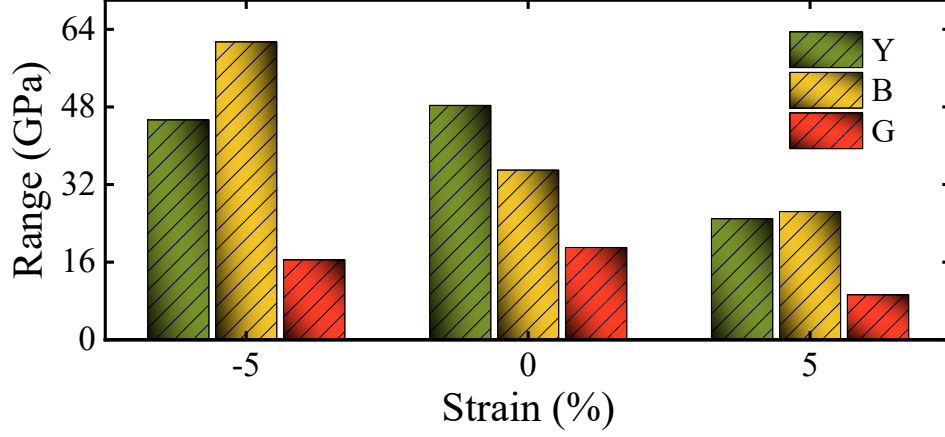

FIG. 4S: Computed bulk modulus (B), Young's modulus (Y), and Shear modulus (G) of the BaSiH<sub>6</sub> structure under -5%/0%/+5% hydrostatic-([111]) strain.

TABLE 2S: Computed numerous elastic properties under hydrostatic-([111]) strain of the BaSiH<sub>6</sub> system.

| Strain | Young's modulus  |                  |       | Linear compressibility |                  |      | Shear modulus    |                  |       | Poisson's ratio  |                  |         |
|--------|------------------|------------------|-------|------------------------|------------------|------|------------------|------------------|-------|------------------|------------------|---------|
|        | Y <sub>min</sub> | Y <sub>max</sub> | A     | β <sub>min</sub>       | β <sub>max</sub> | A    | G <sub>min</sub> | G <sub>max</sub> | A     | ν <sub>min</sub> | ν <sub>max</sub> | A       |
| -5%    | 25.686           | 101.04           | 3.93  | 4.4662                 | 7.2305           | 1.62 | 7.32             | 32.68            | 4.464 | -0.1803          | 0.86444          | ∞       |
| 0%     | 18.836           | 83.86            | 4.45  | 5.062                  | 19.698           | 3.89 | 8.7775           | 32.041           | 3.65  | -0.1059          | 0.83969          | ∞       |
| +5%    | 12.883           | 54.34            | 4.218 | 9.348                  | 13.56            | 1.45 | 3.63             | 22.292           | 6.14  | 0.05019          | 0.77489          | 15.4390 |

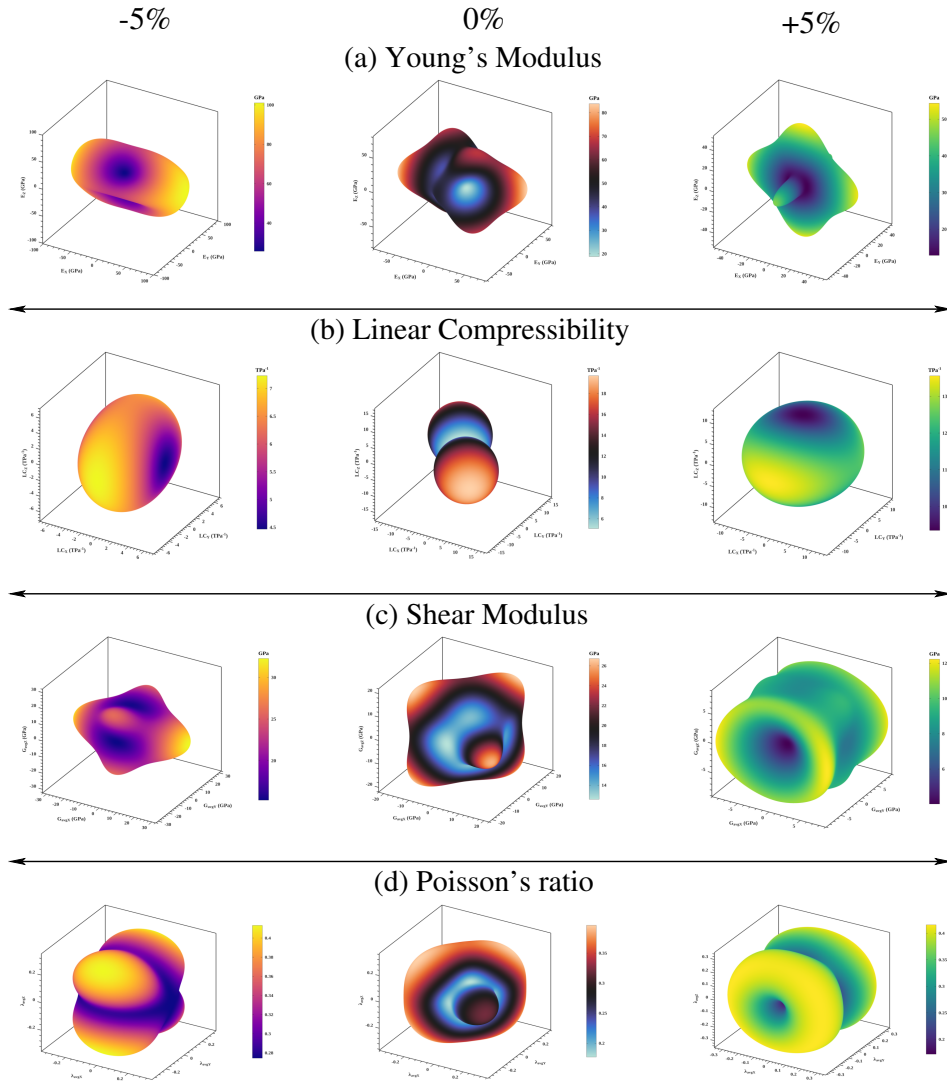

FIG. 5S: Three dimensional directionally dependent (a) Young's modulus, (b) linear compressibility, (c) Shear modulus, and (d) Poisson's ratio for the BaSiH<sub>6</sub> structure under  $-5\%$  (left column)/ $0\%$  (middle column)/ $+5\%$  (right column) hydrostatic- $([111])$  strain.

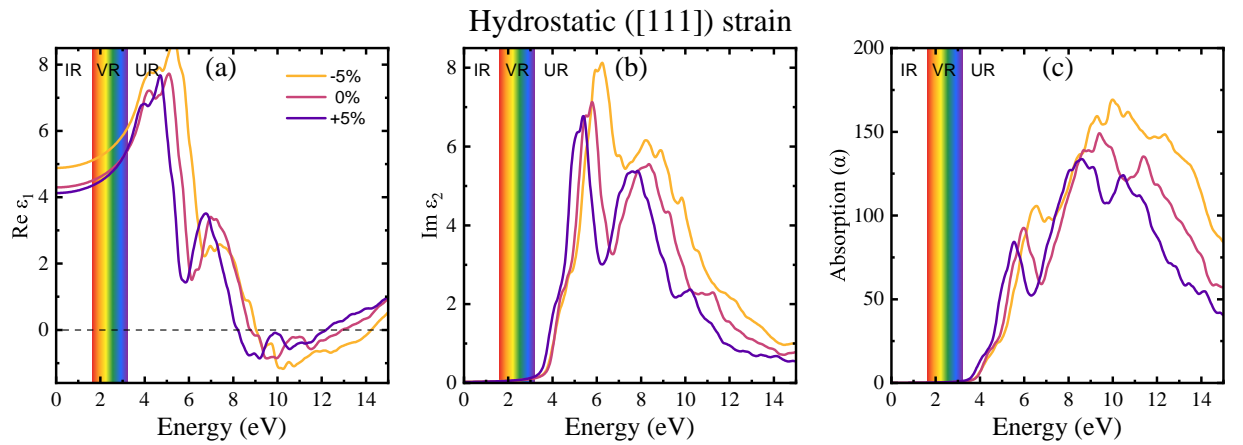

FIG. 6S: Calculated various optical parameters such as (a) real dielectric part  $\epsilon_1$ , (b) imaginary dielectric part  $\epsilon_2$ , and absorption coefficient ( $\alpha$ ) in  $10^4 \text{ cm}^{-1}$  under  $-5\%/0\%/+5\%$  hydrostatic $([110])$  strain for the BaSiH<sub>6</sub> structure.

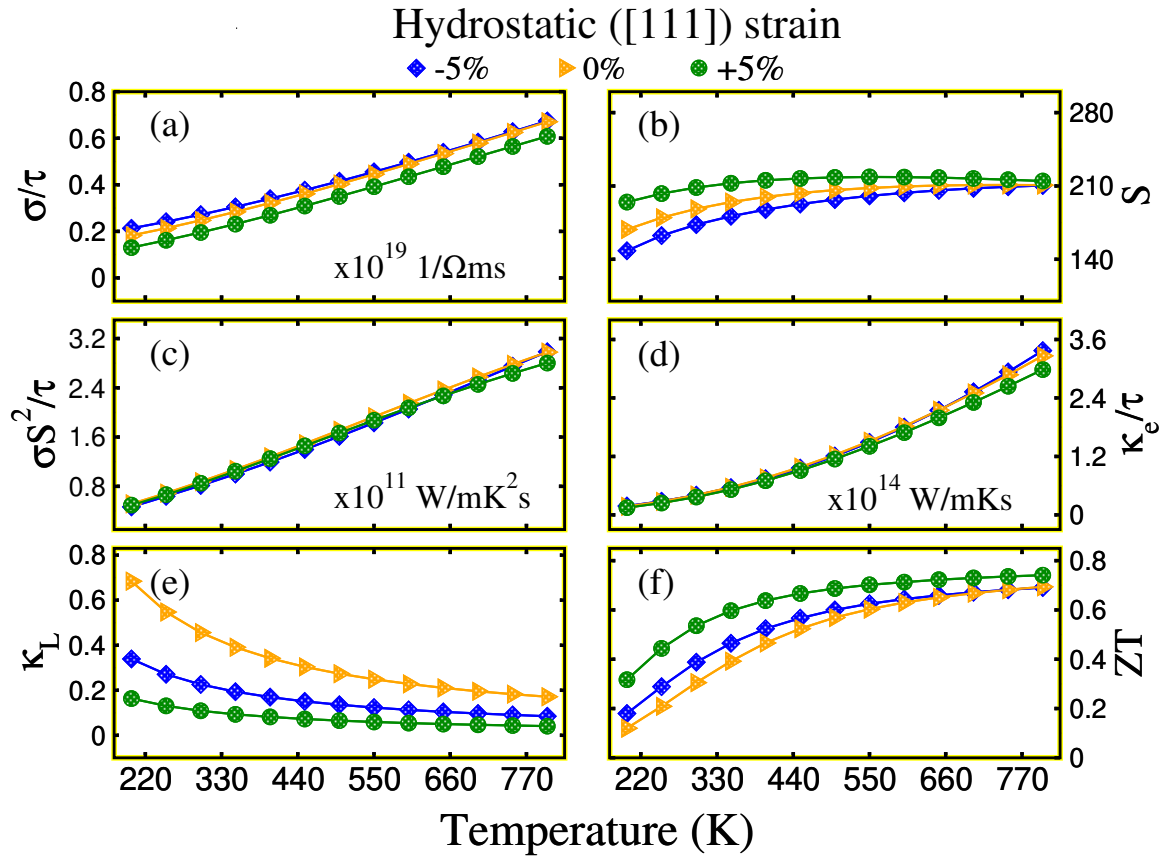

FIG. 7S: Various computed thermoelectric parameters under  $-5\%/0\%/+5\%$  hydrostatic-([111]) strain for the  $\text{BaSiH}_6$  structure.
